# Supplementary material for: Synthesis and In Silico Docking Study towards M-Pro of Novel Heterocyclic Compounds Derived from Pyrazolopyrimidinone as Putative SARS-CoV-2 Inhibitors
Source: MDPI journal article supplement (doi:10.3390/molecules27165303), 2022-08-19

# Synthesis and In Silico Docking Study towards M-Pro of Novel Heterocyclic Compounds Derived from Pyrazolopyrimidinone as Putative SARS-CoV-2 Inhibitors

Mabrouk Horchani <sup>1</sup>, Niels V. Heise <sup>2</sup>, René Csuk <sup>2,\*</sup>, Hichem Ben Jannet <sup>1,\*</sup>, Abdel Halim Harrath <sup>3</sup> and Anis Romdhane <sup>1</sup>

<sup>1</sup> Laboratory of Heterocyclic Chemistry, Natural Products and Reactivity, Medicinal Chemistry and Natural Products (LR11ES39), Faculty of Sciences of Monastir, University of Monastir, Monastir 5000, Tunisia

<sup>2</sup> Department of Organic Chemistry, Martin-Luther-University Halle-Wittenberg, Kurt-Mothes-Str. 2, D-06120 Halle, Germany

<sup>3</sup> College of Science, Department of Zoology, King Saud University, Riyadh 11451, Saudi Arabia

\* Correspondence: rene.csuk@chemie.uni-halle.de (R.C.); hichem.bjannet@gmail.com (H.B.J.)

## General procedures

TLC was carried out on silica gel (Macherey-Nagel, detection under UV light and with cerium molybdate reagent). The used solvents were dried according to usual procedures. Melting points are uncorrected (Leica hot stage microscope, or BUCHI melting point M-565). IR spectra were recorded on a Perkin Elmer FT-IR spectrometer Spectrum 1000 or on a Perkin-Elmer Spectrum Two (UATR Two Unit). NMR spectra were recorded using the Agilent spectrometers DD2 500 MHz and VNMR5 400 MHz (d given in ppm, J in Hz; typical experiments: APT, H-H-COSY, HMBC, HSQC, NOESY), MS spectra were taken on an Advion Expression CMS instrument, and elemental analyses were conducted on a Foss-Heraeus Vario EL (CHNS) unit.

**5-amino-3-methyl-1-phenyl-1H-pyrazole-4-carbonitrile (1)**

Has already been investigated with reference:

M. Horchani et al., (2021), Int J Mol Sci., 22(19):10258.

doi: 10.3390/ijms221910258.

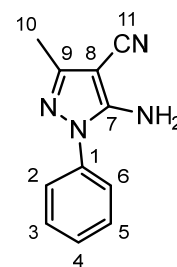

**Compound (2)**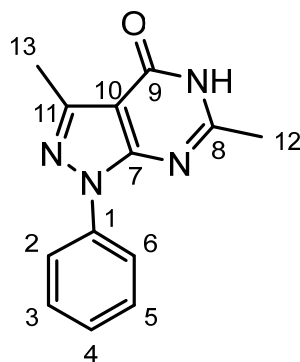

## NMR Spectra of 2

 $^1\text{H}$ -NMR (500 MHz, d-DMSO)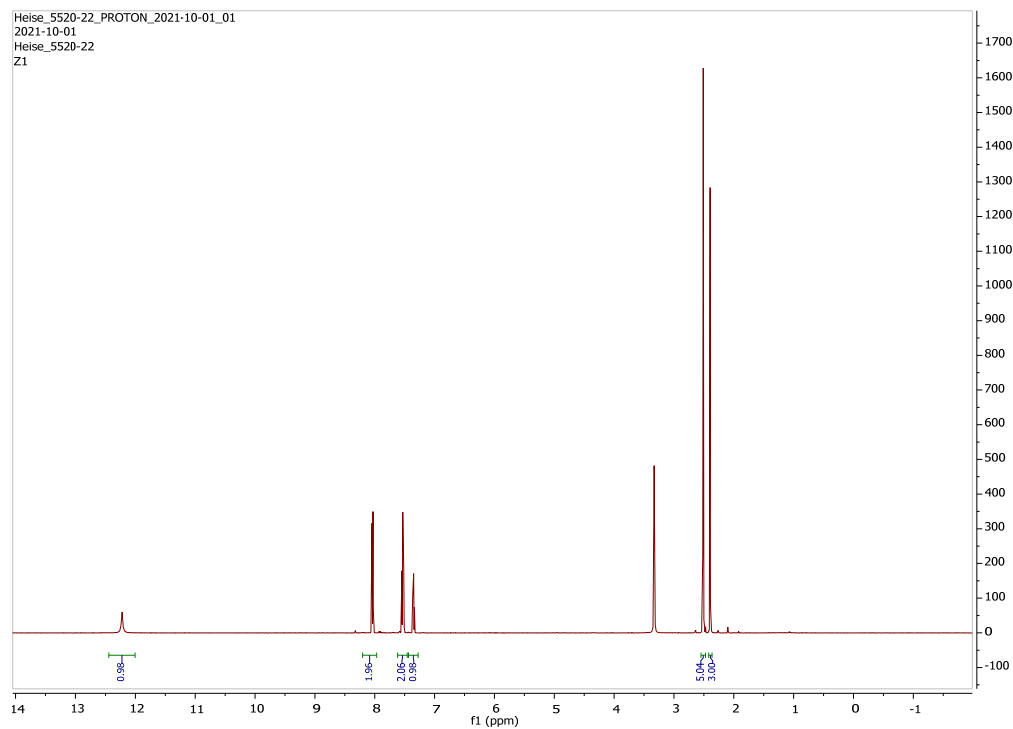 $^{13}\text{C}$ -NMR (126 MHz, d-DMSO)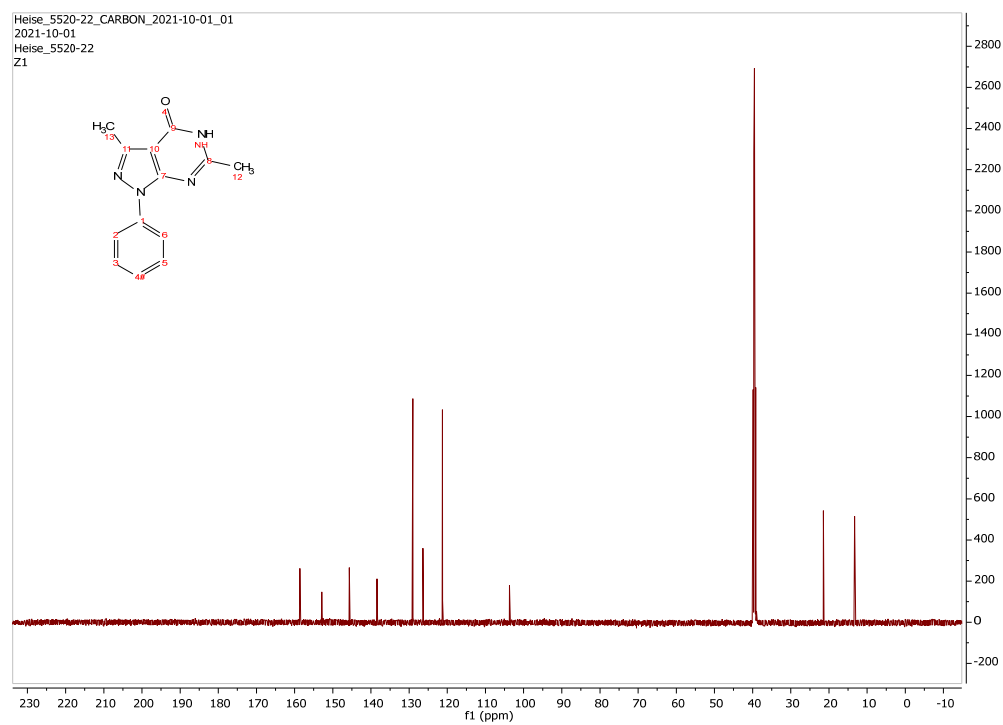

**Compound (3)**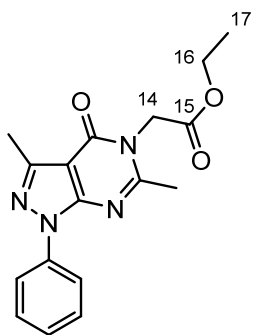

## NMR Spectra of 3

<sup>1</sup>H-NMR (500 MHz, d-DMSO)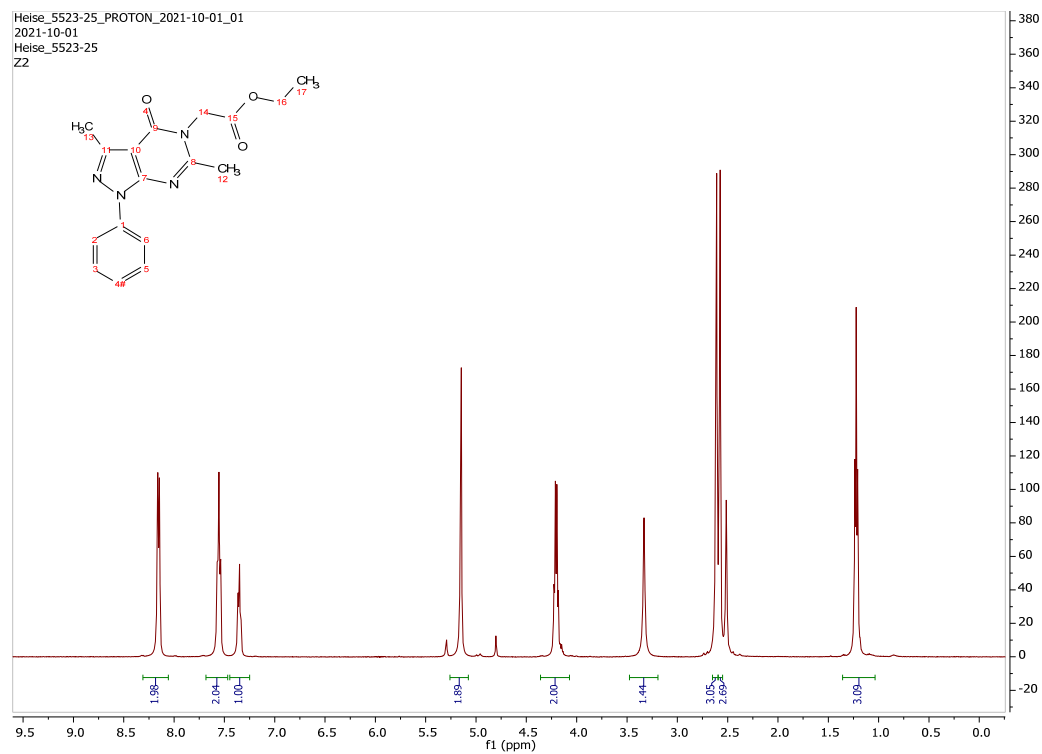<sup>13</sup>C-NMR (126 MHz, d-DMSO)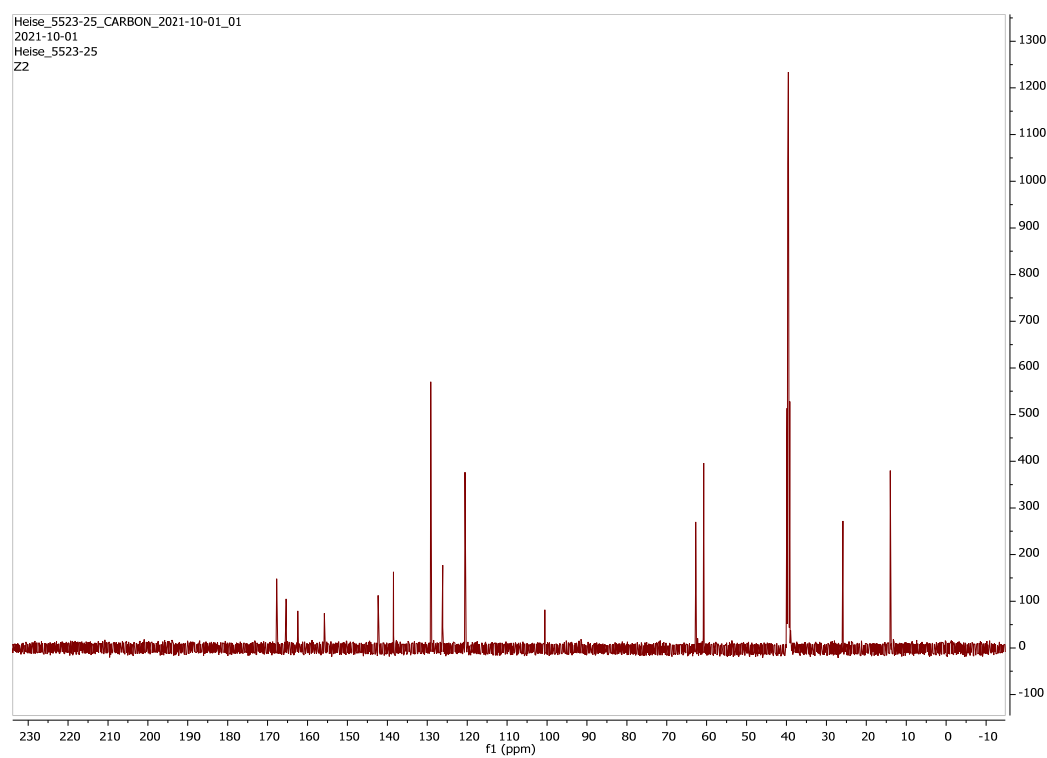

## Compound (4)

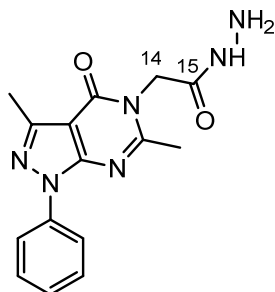

## NMR Spectra of 4

<sup>1</sup>H-NMR (500 MHz, d-DMSO)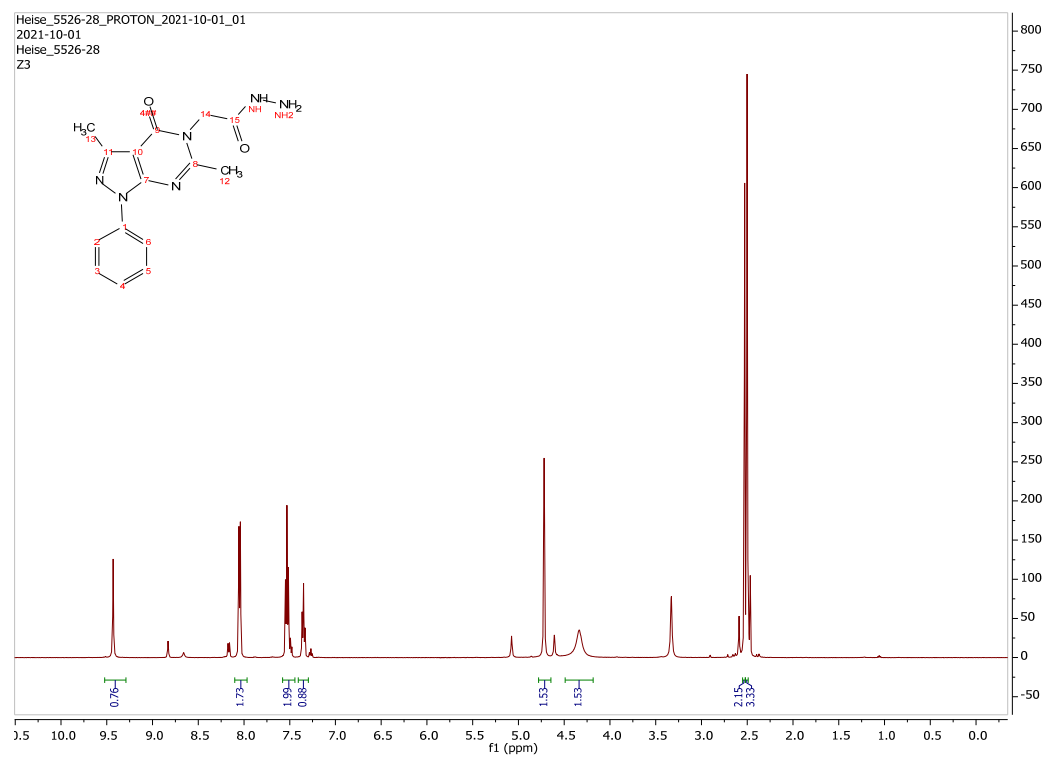



$^{13}\text{C}$ -NMR (126 MHz, d-DMSO)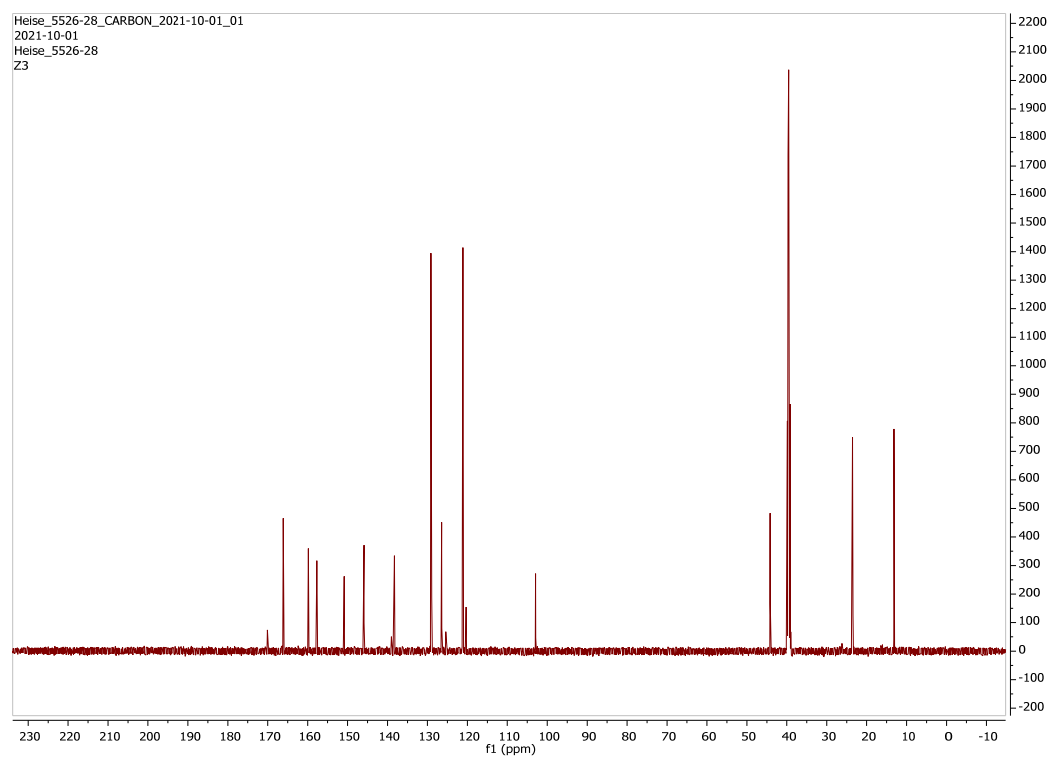

## Compound (5)

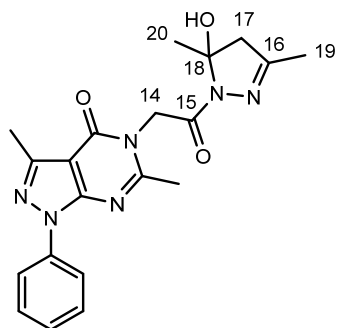

## NMR Spectra of 5

<sup>1</sup>H-NMR (500 MHz, d-DMSO)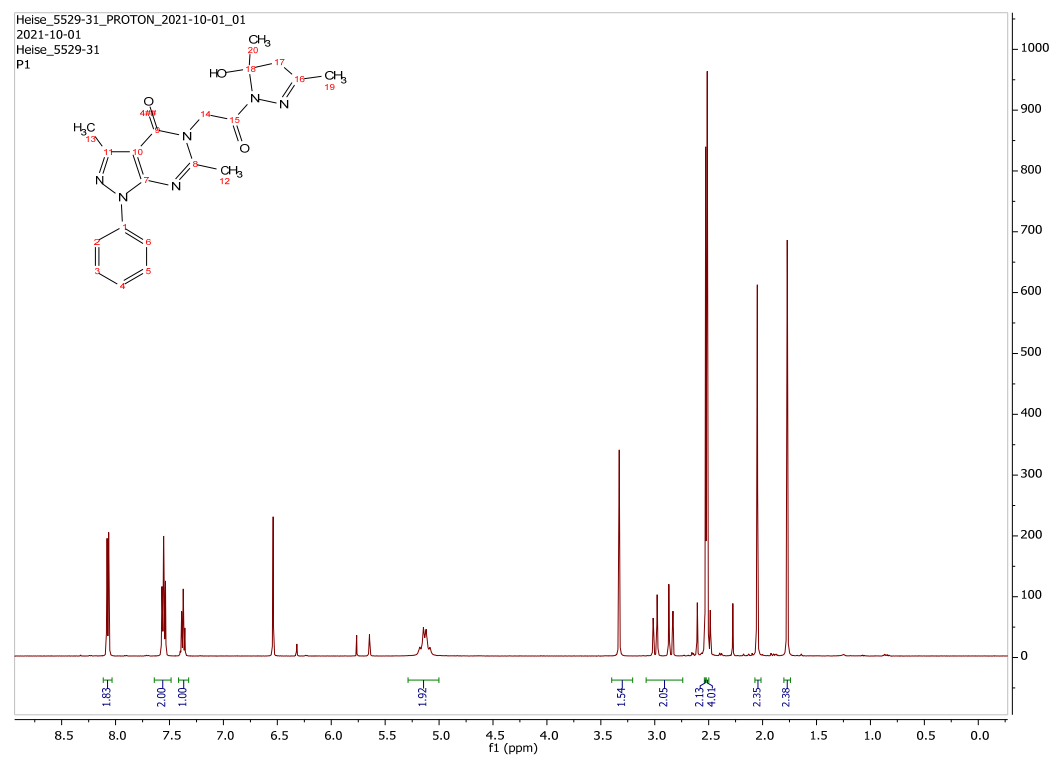

Expansions of the  $^1\text{H}$  NMR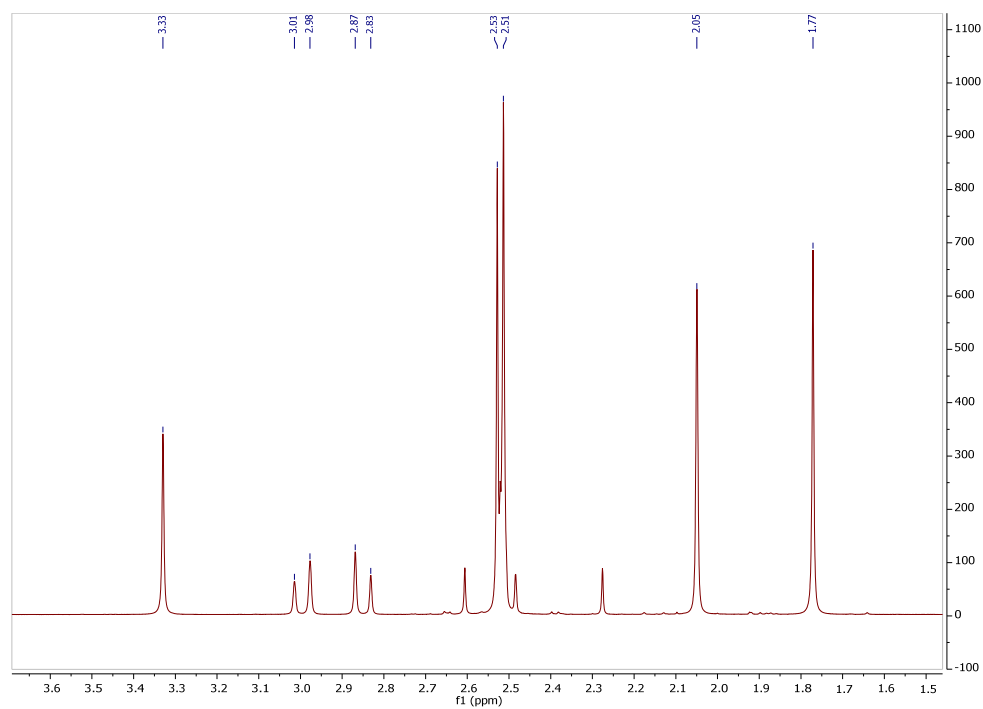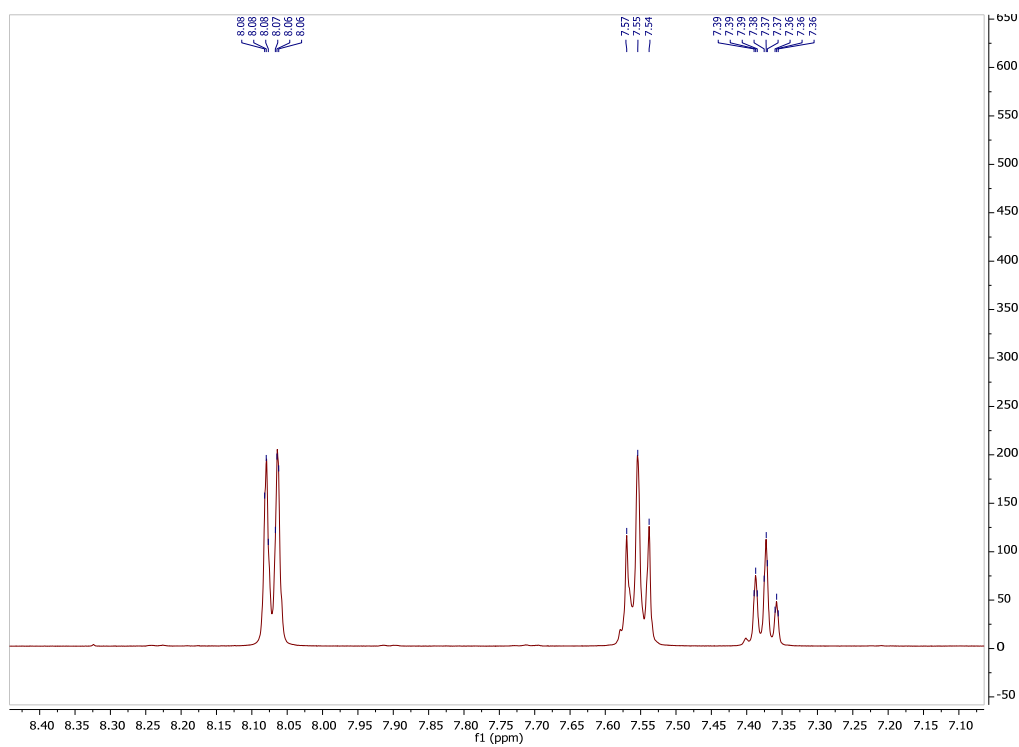

gHSQC-experiment

gHMBC-experiment

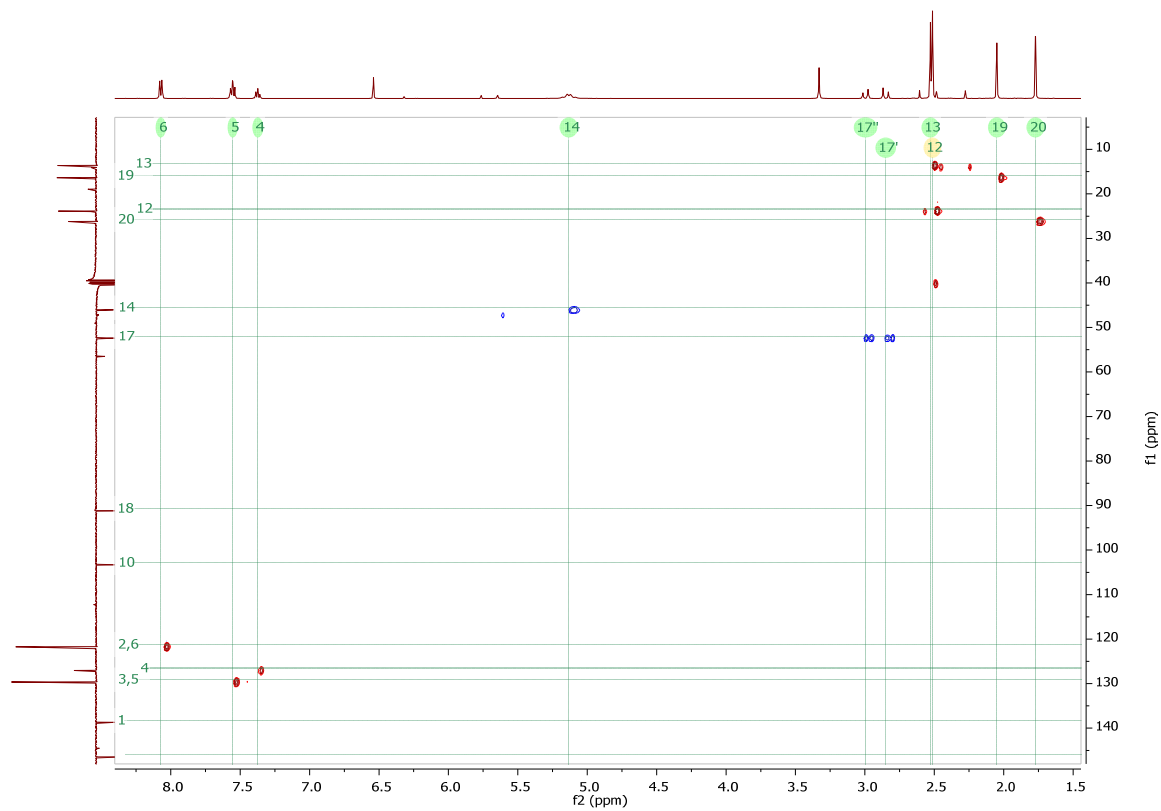

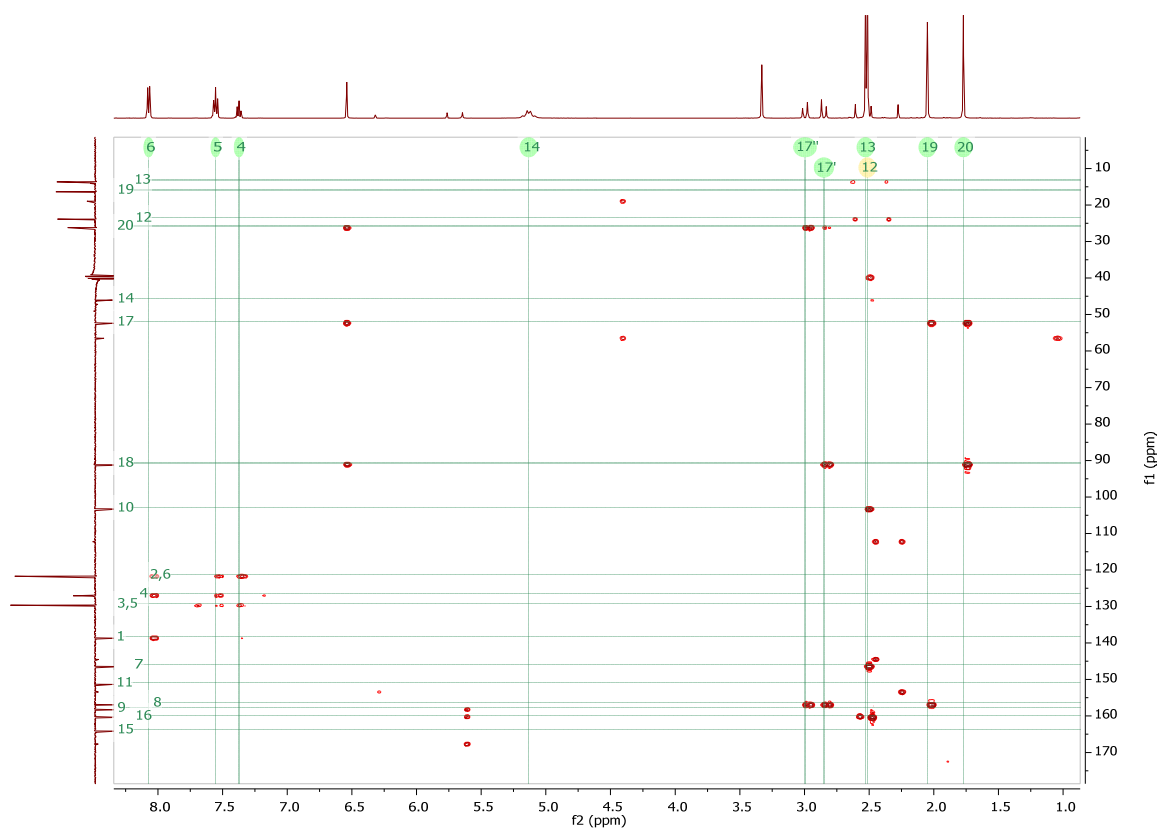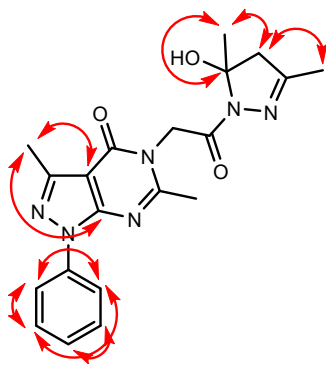

## COSY-experiment

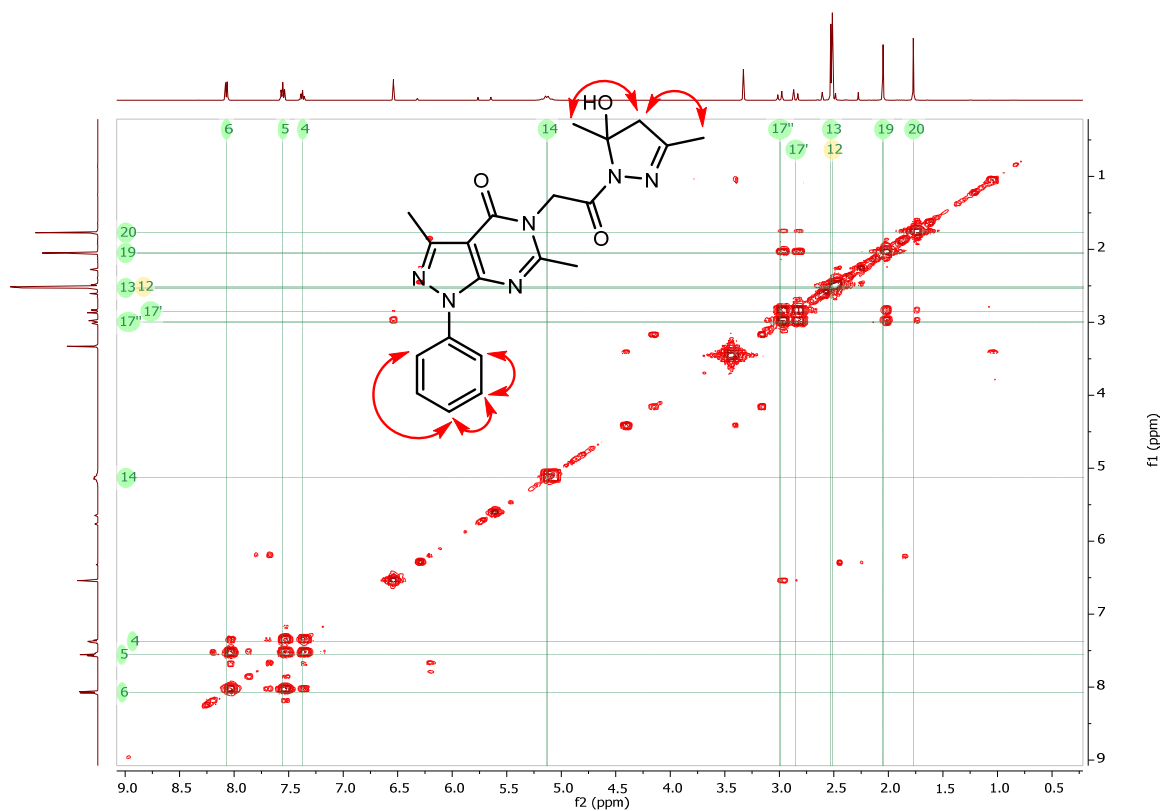

## NOESY-experiment

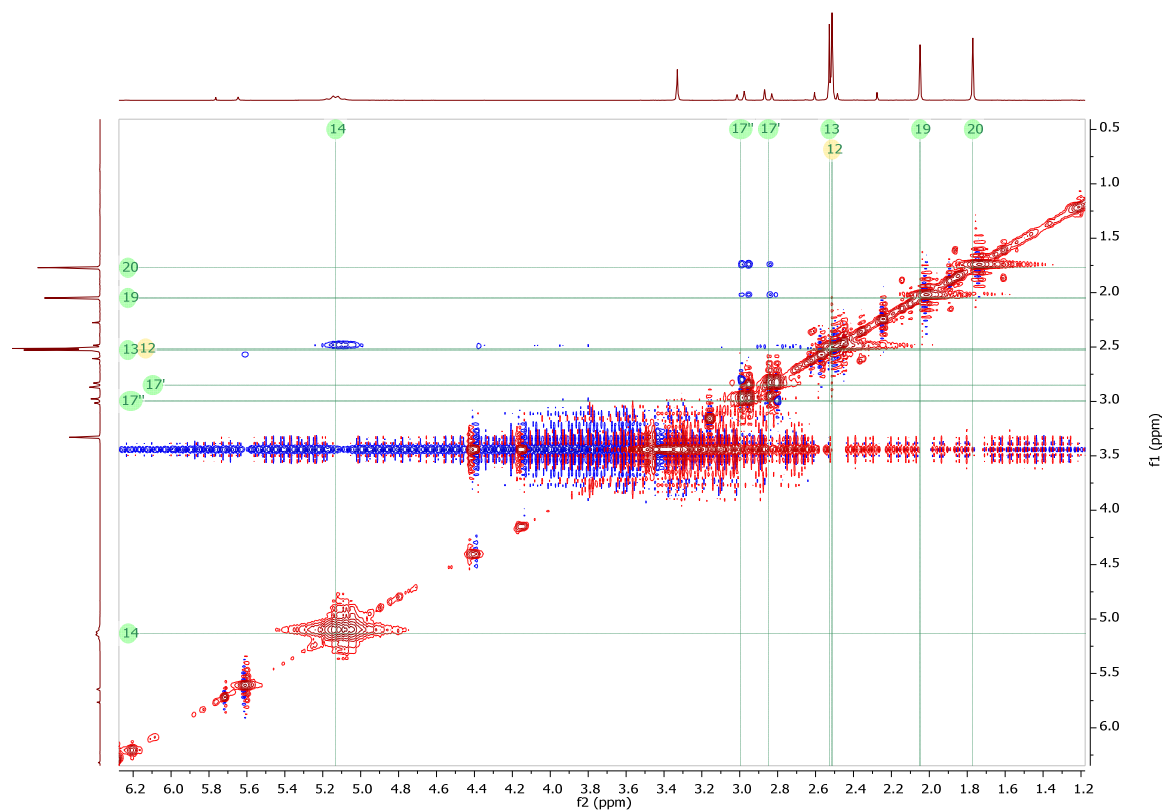

$^{13}\text{C}$ -NMR  
(126 MHz,  
d-DMSO)

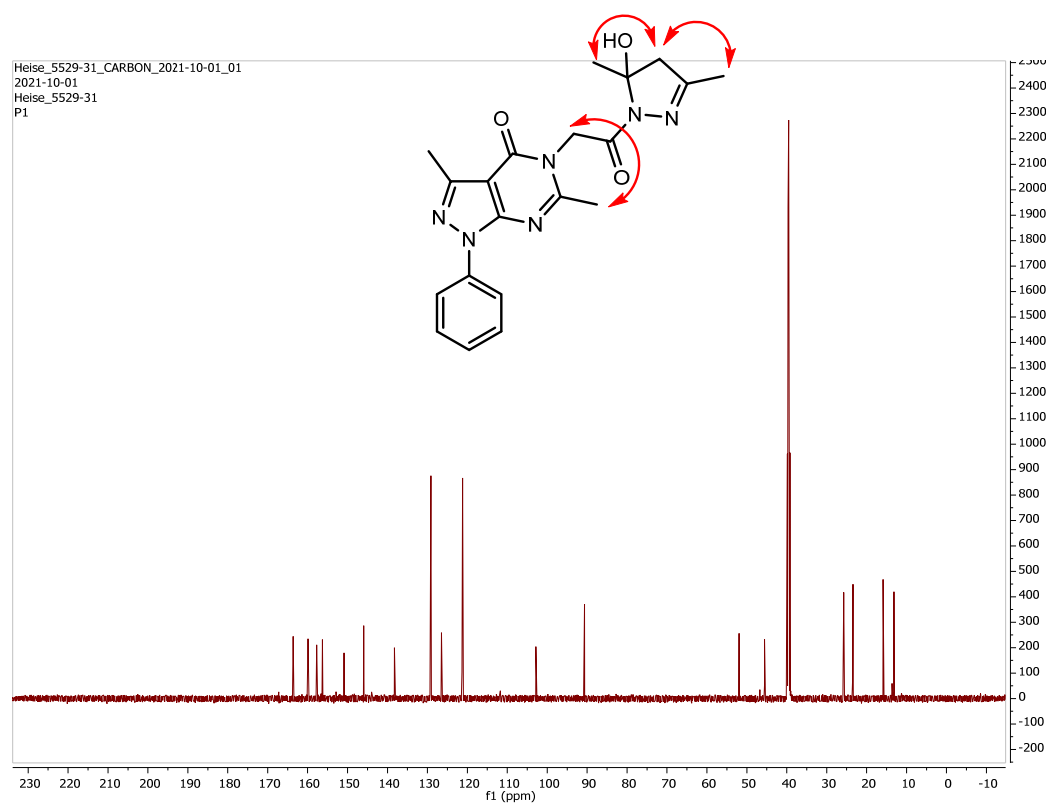



## APT- experiment

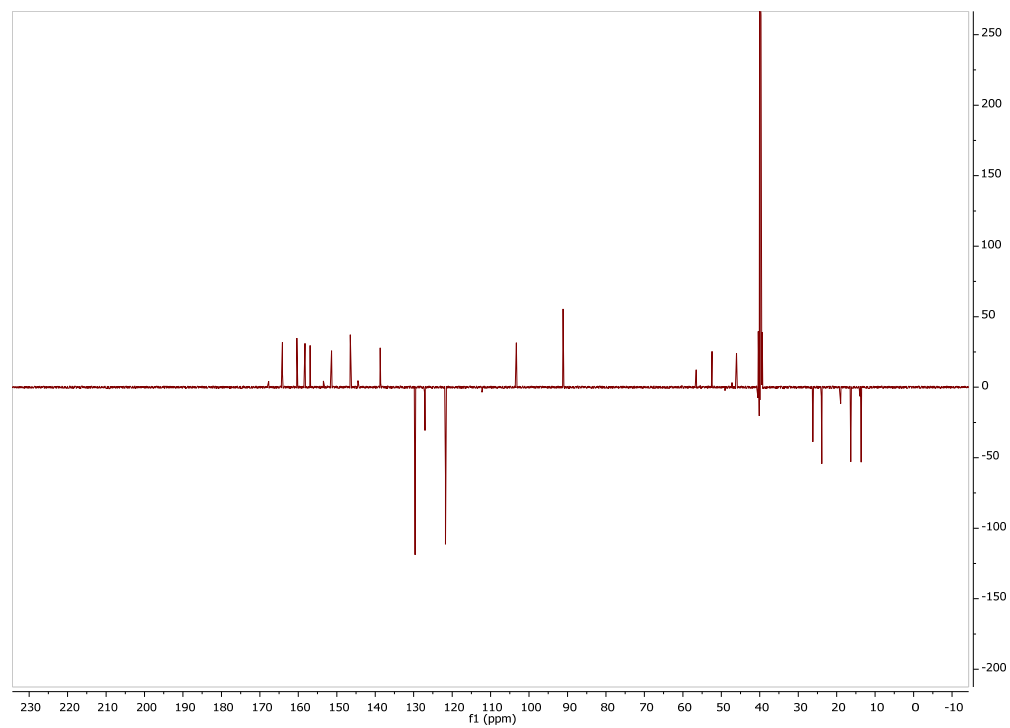

**Compound (6)**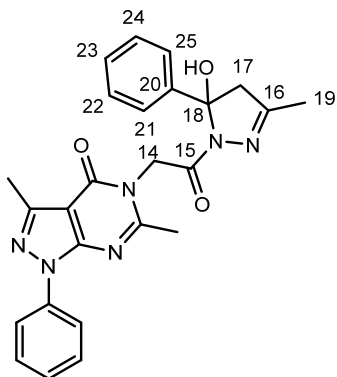

## NMR Spectra of 6

<sup>1</sup>H-NMR (500 MHz, d-DMSO)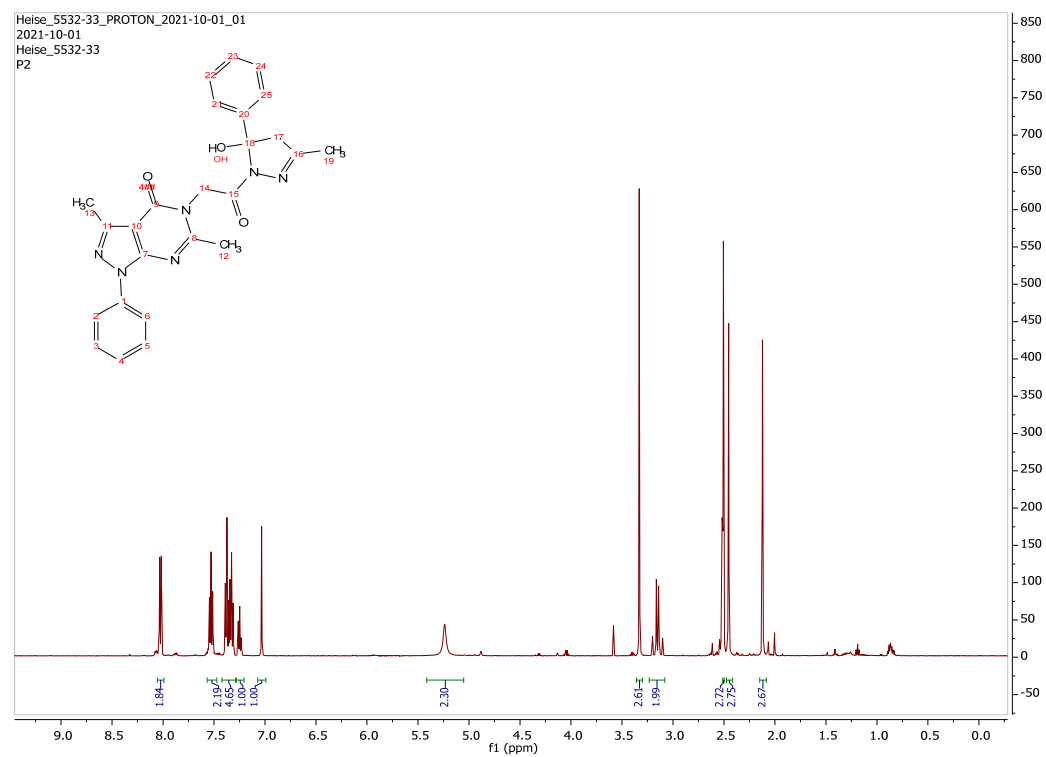

$^{13}\text{C}$ -NMR (126 MHz, d-DMSO)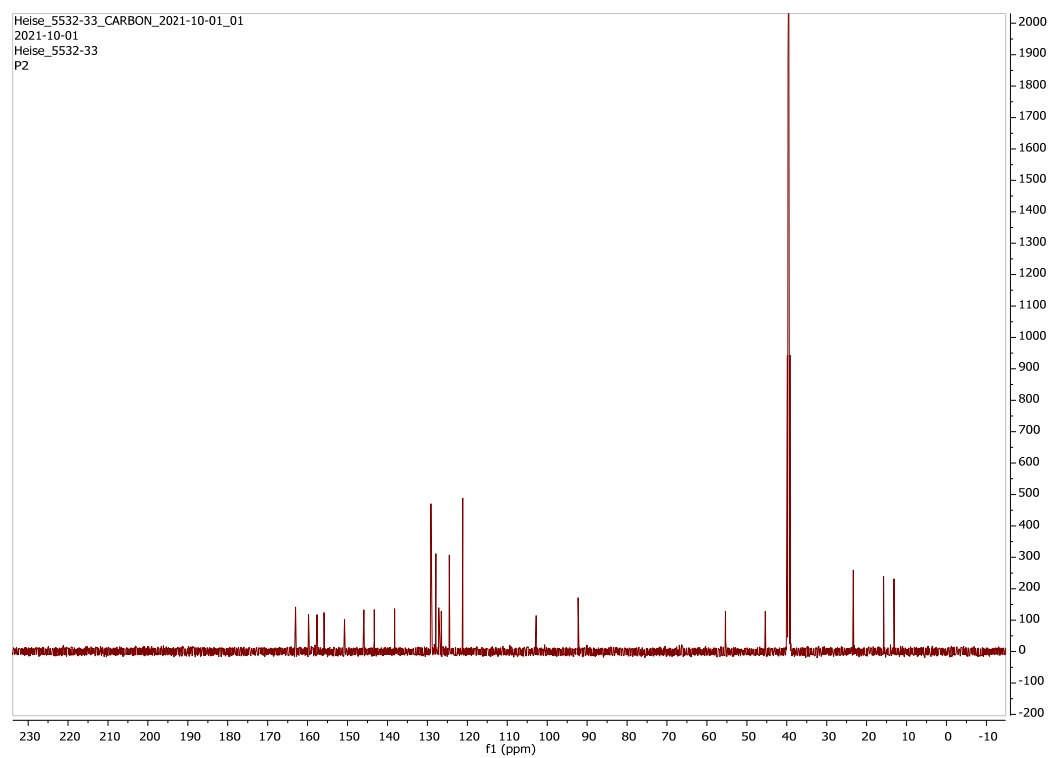

### Compound (7)

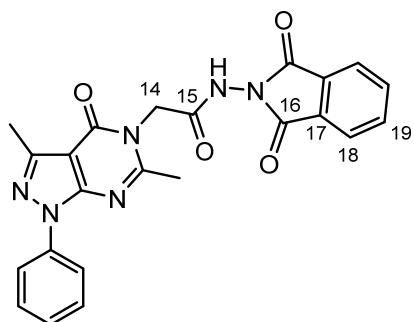

<sup>1</sup>H-NMR (500 MHz, d-DMSO)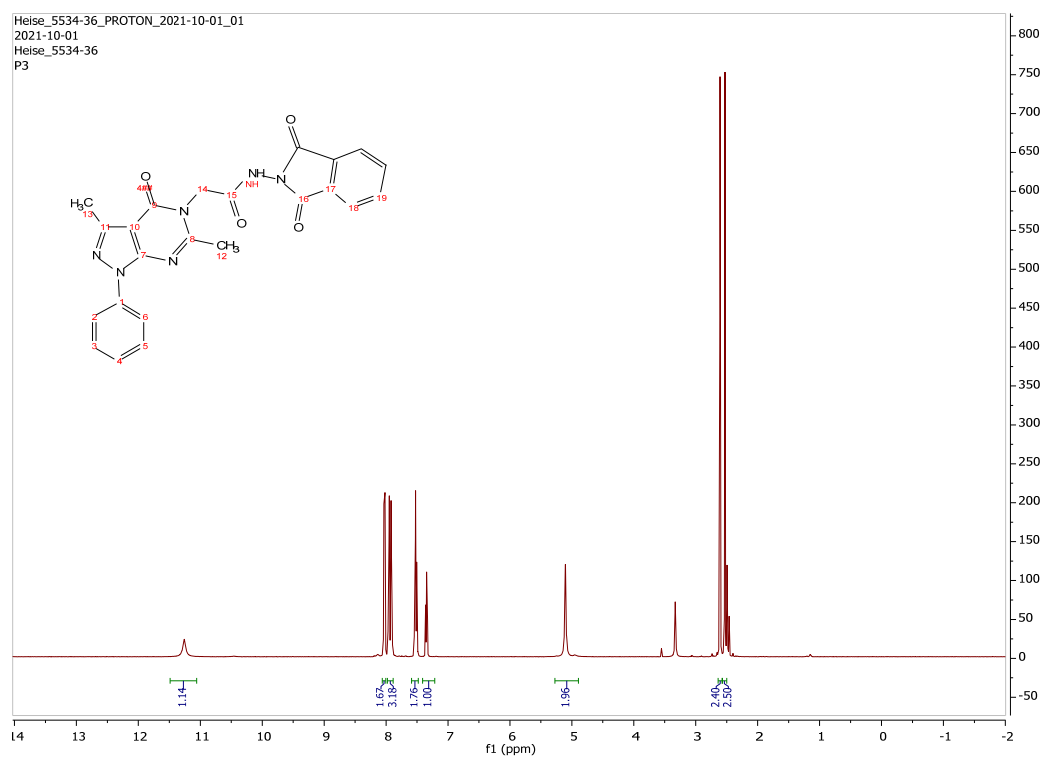

Expansions of the  $^1\text{H}$  NMR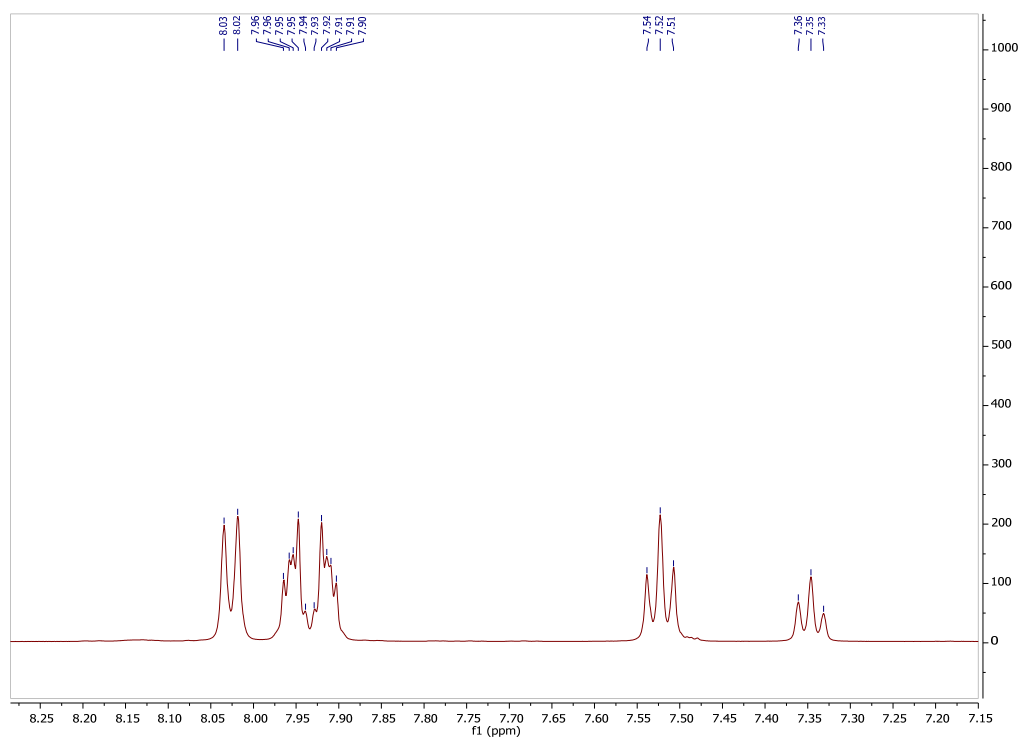

## gHSQC-experiment

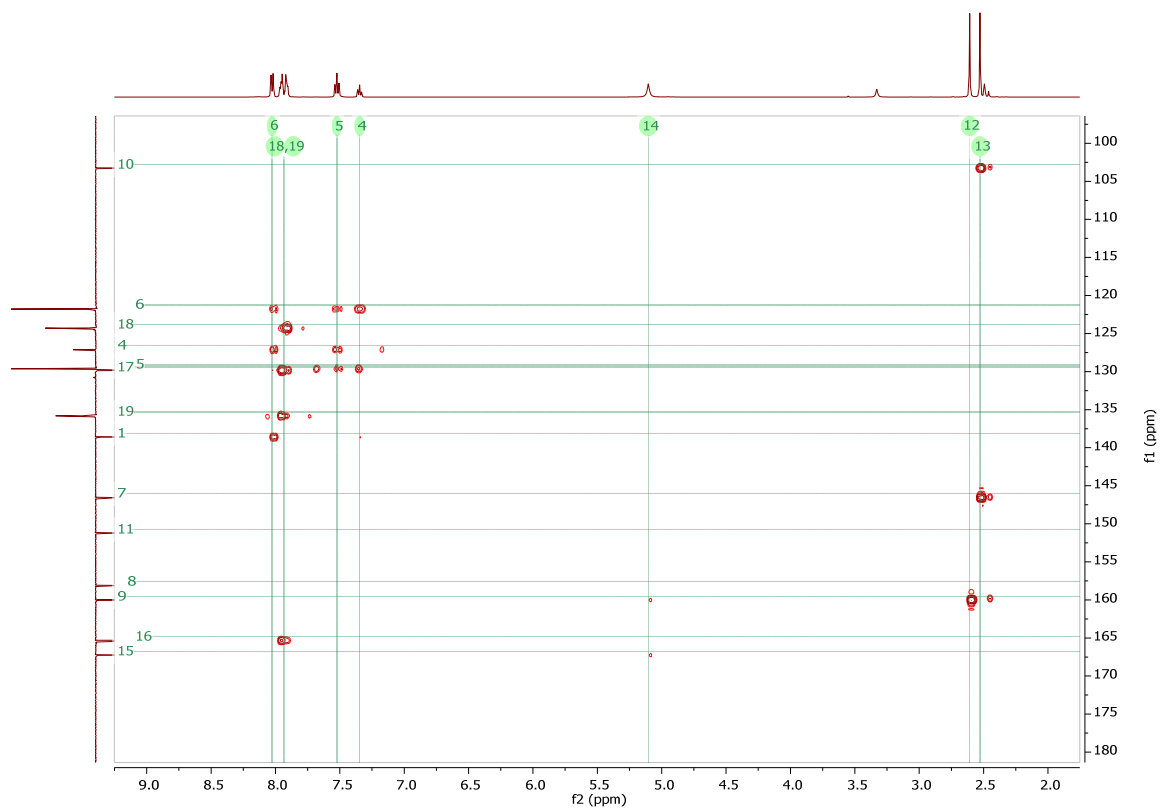



## gHMBC-experiment

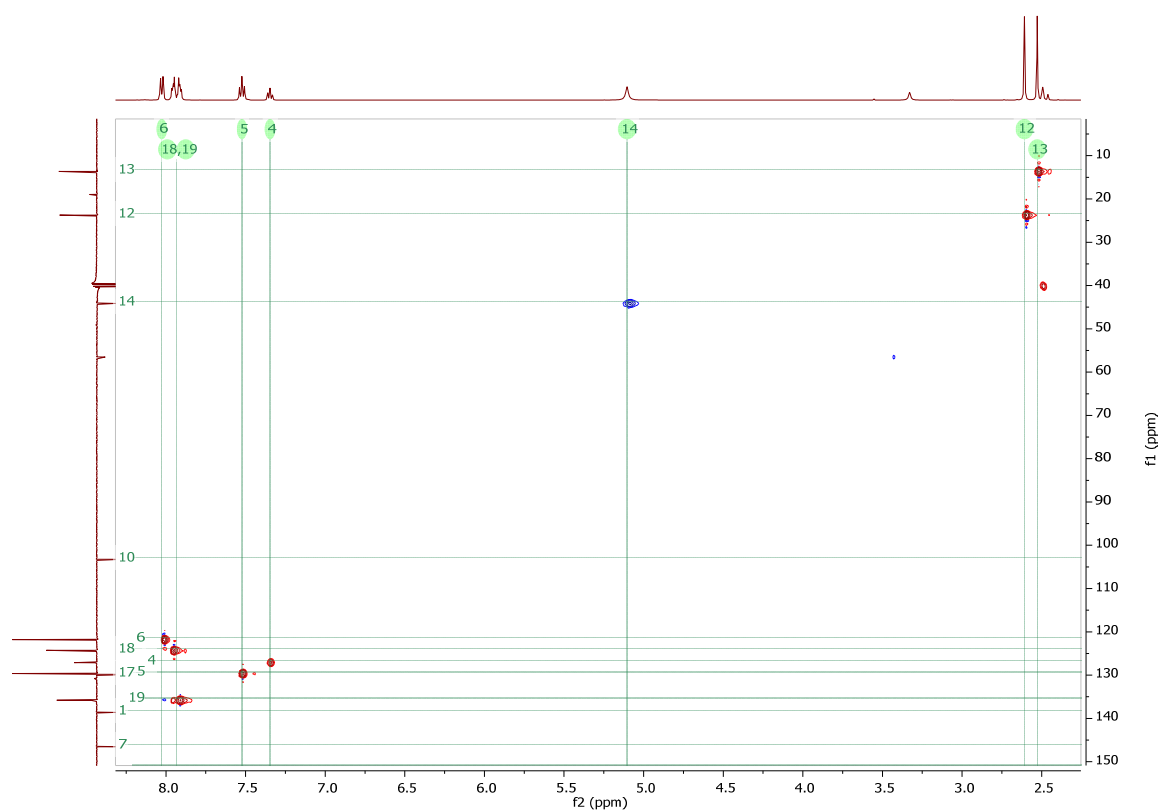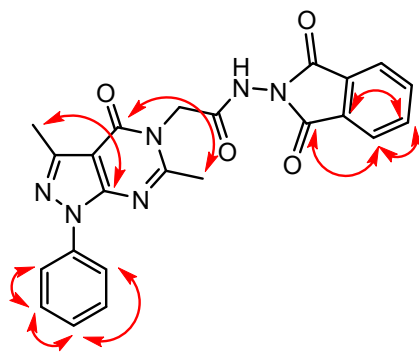

## COSY-Experiment

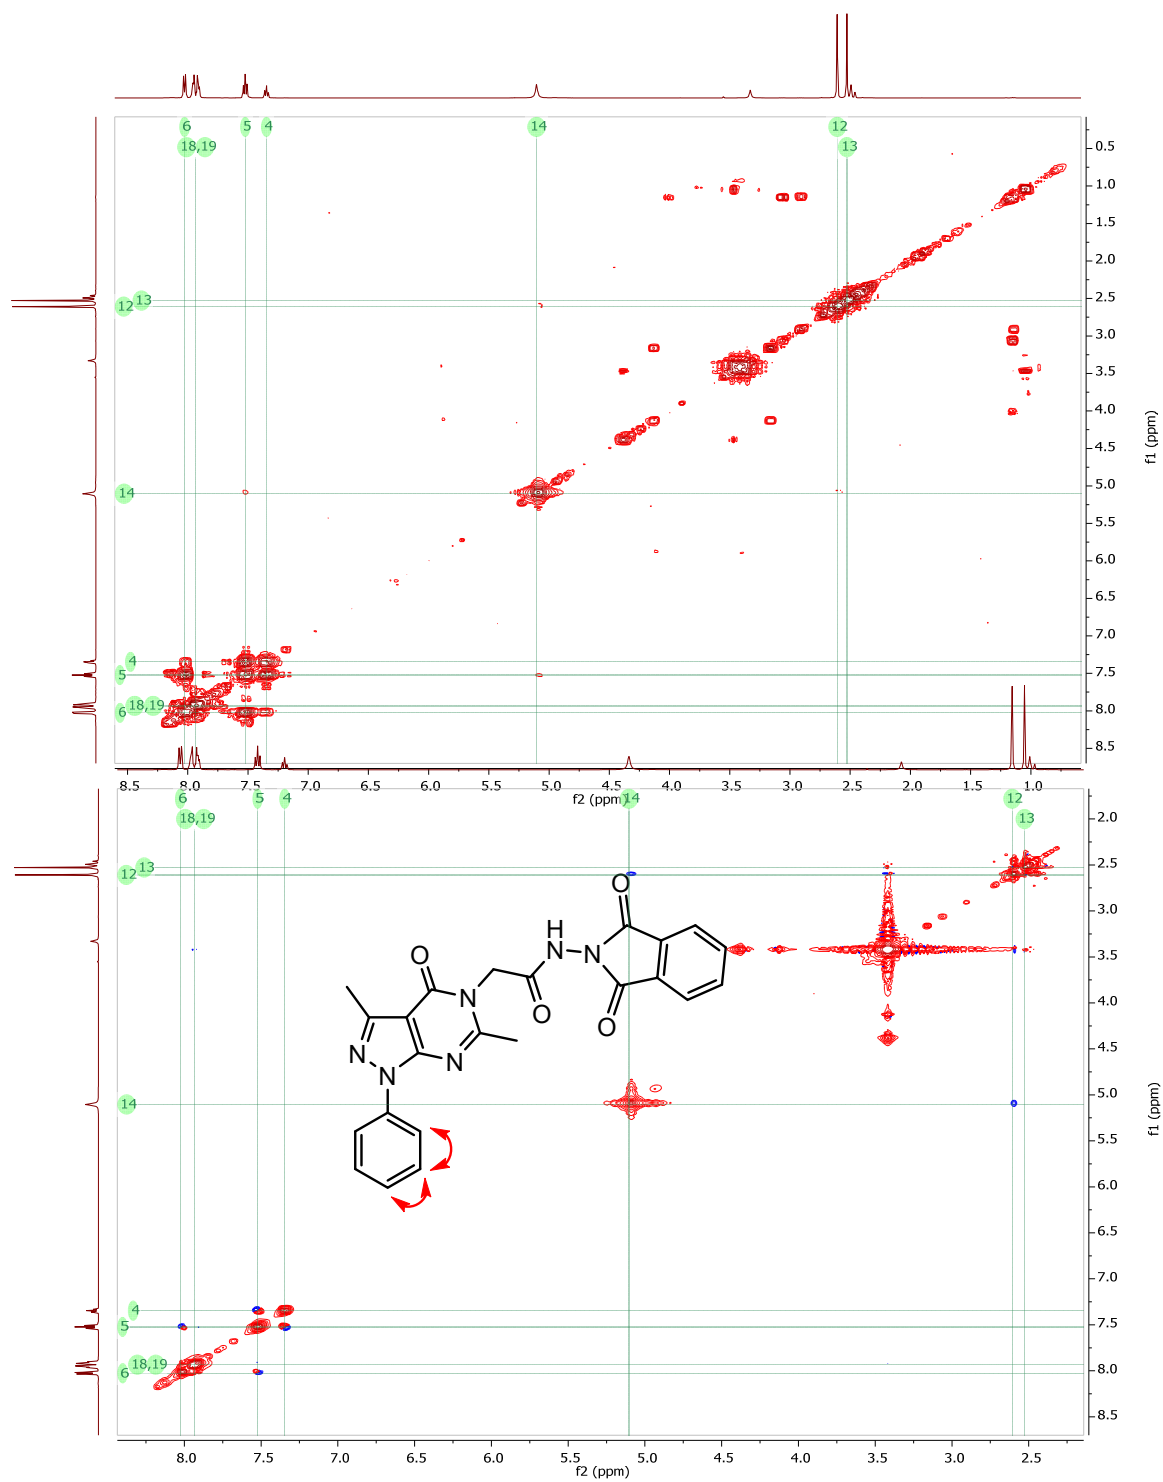

NOESY-

experiment

$^{13}\text{C}$ -NMR (126 MHz, d-DMSO)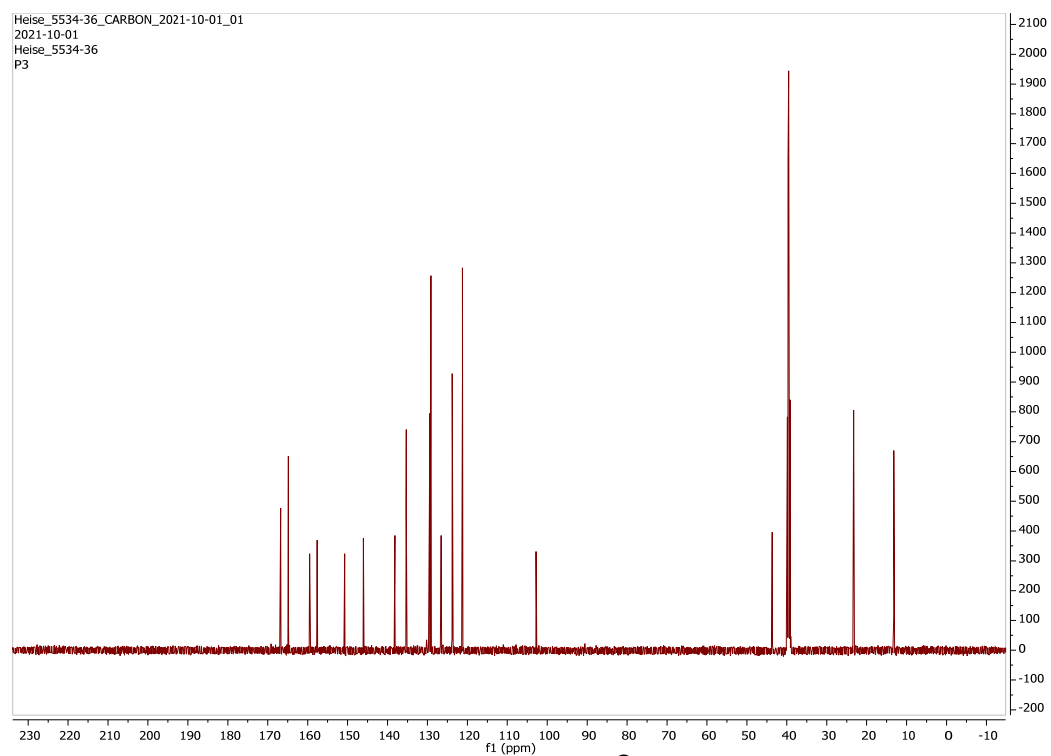

APT-experiment

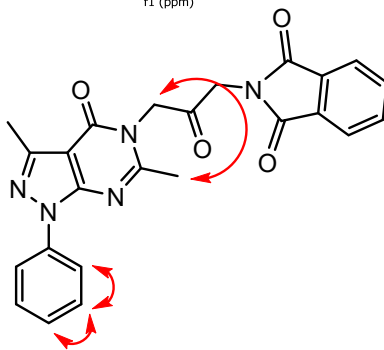

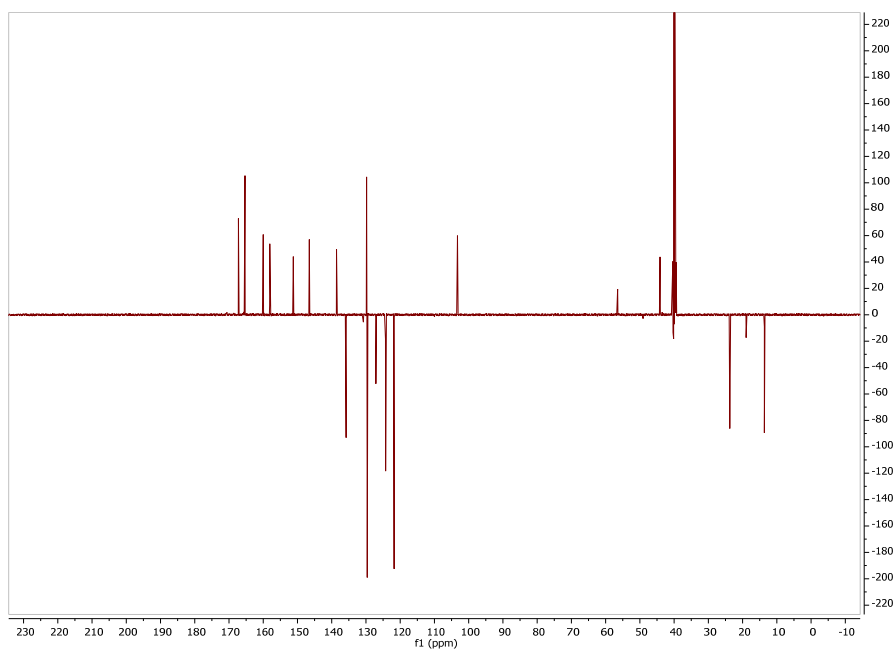**Compound (8)**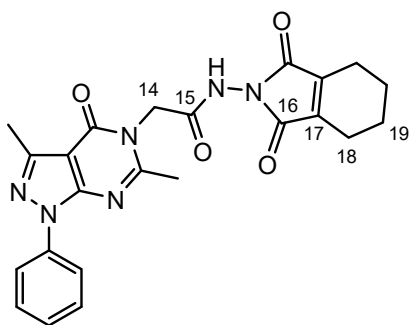

## NMR Spectra of 8

<sup>1</sup>H-NMR (500 MHz, d-DMSO)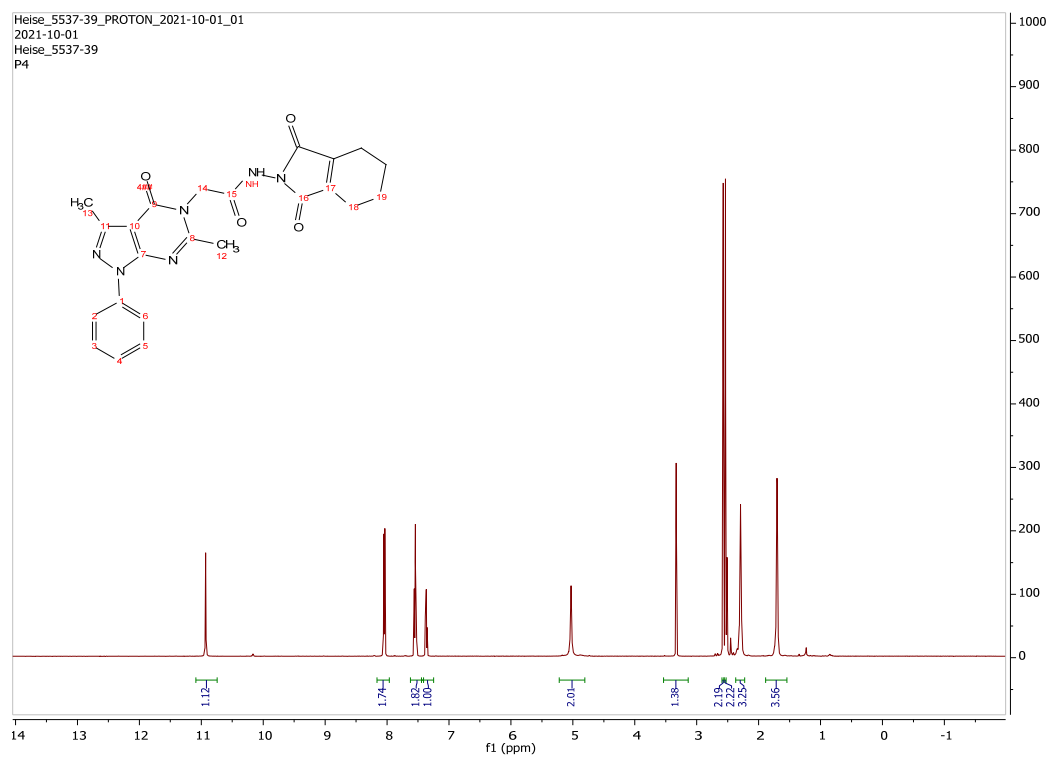

$^{13}\text{C}$ -NMR (126 MHz, d-DMSO)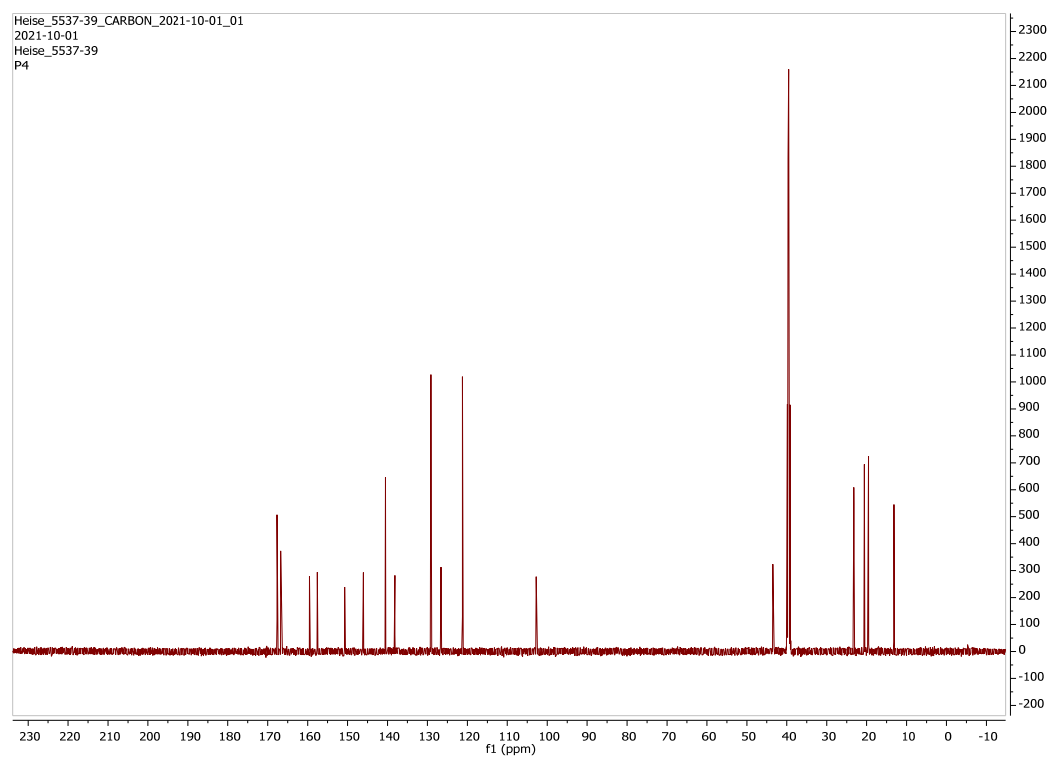

### Compound (9)

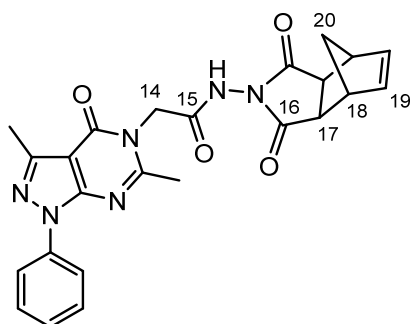

## NMR Spectra of 9

<sup>1</sup>H-NMR (500 MHz, d-DMSO)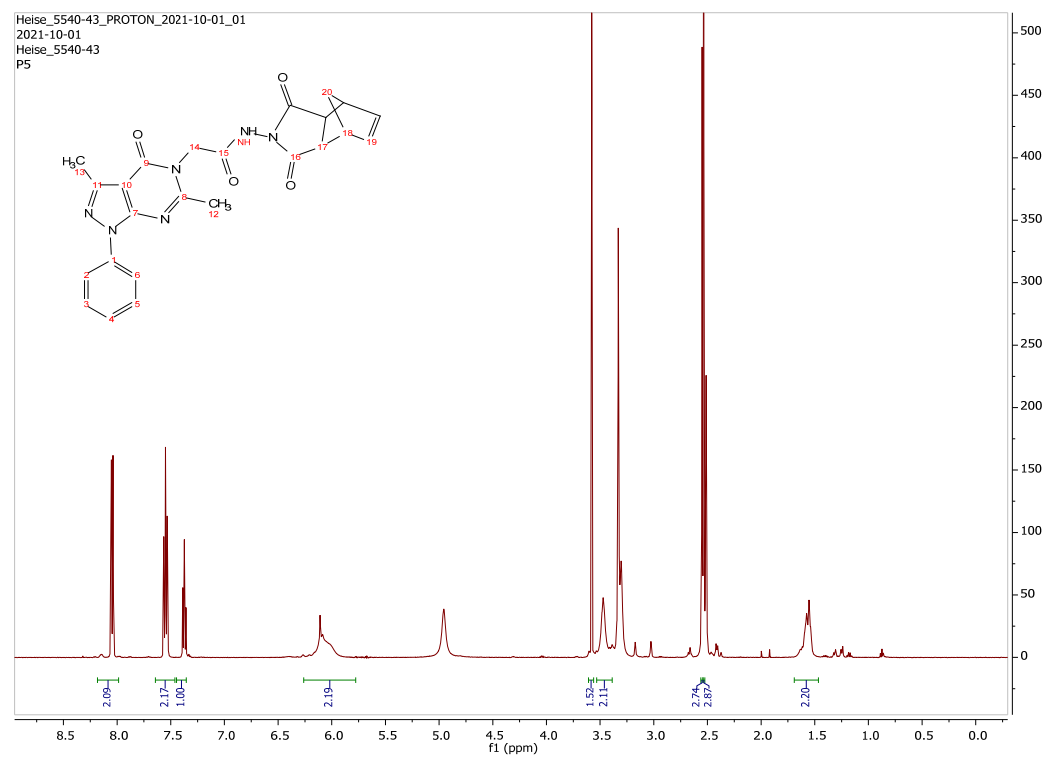



$^{13}\text{C}$ -NMR (126 MHz, d-DMSO)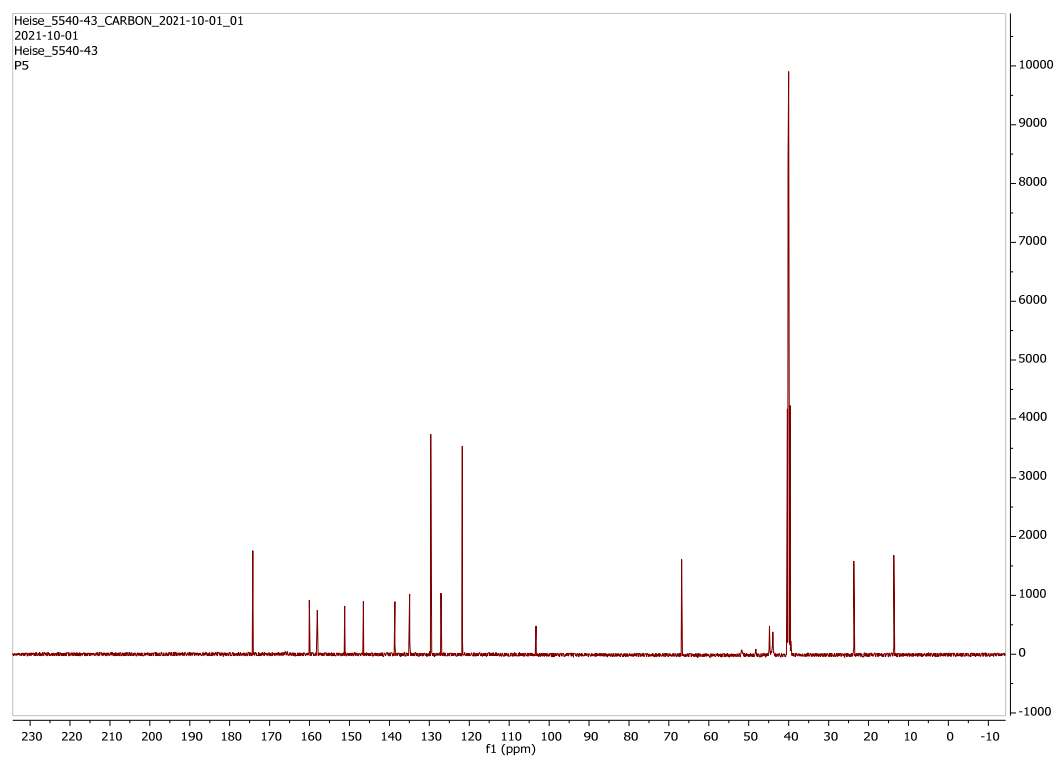

**Compound (10)**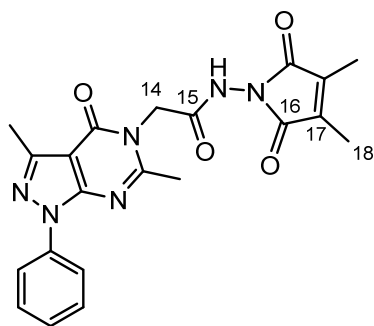

## NMR Spectra of 10

<sup>1</sup>H-NMR (500 MHz, d-DMSO)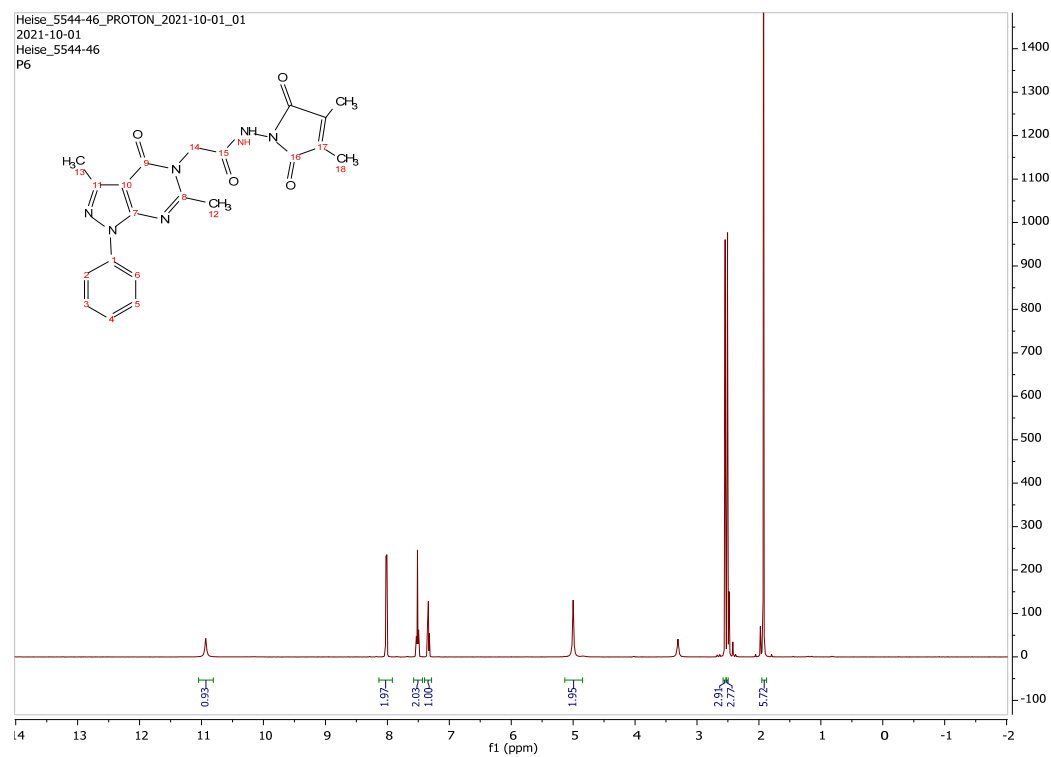

$^{13}\text{C}$ -NMR (126 MHz, d-DMSO)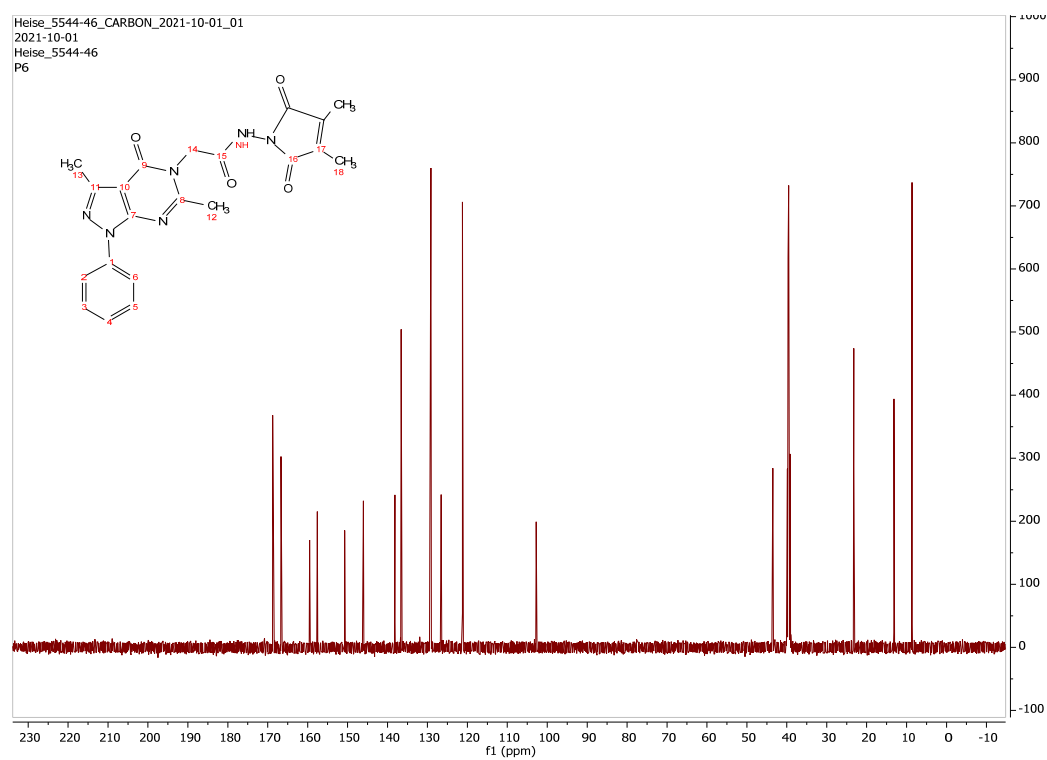

### Compound (11)

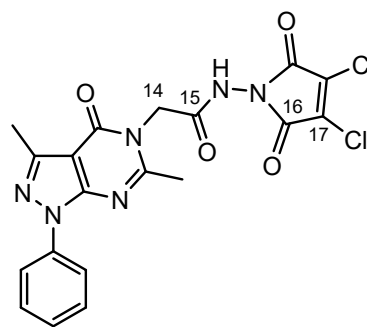

## NMR Spectra of 11

<sup>1</sup>H-NMR (300 MHz, d-DMSO)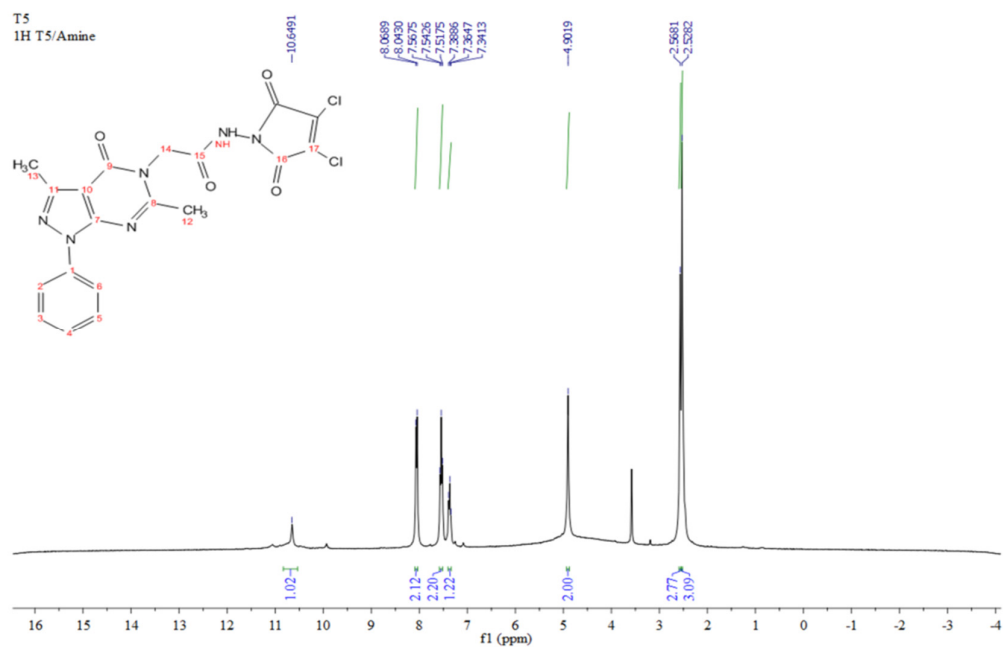

$^{13}\text{C}$ -NMR (126 MHz, d-DMSO)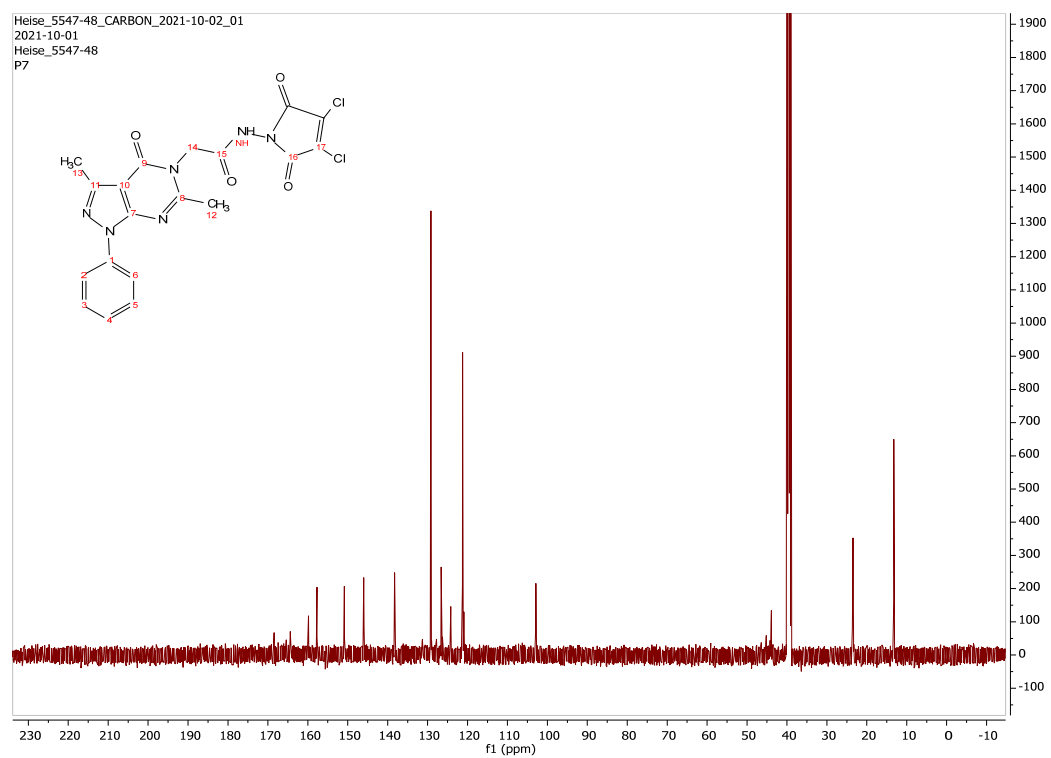

### Compound (12)

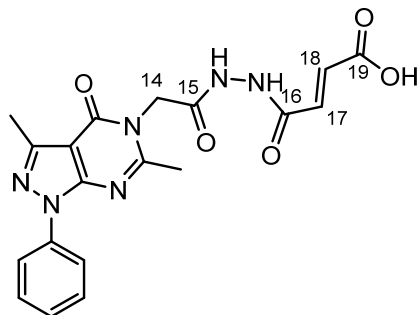



## NMR Spectra of 12

<sup>1</sup>H-NMR (500 MHz, d-DMSO)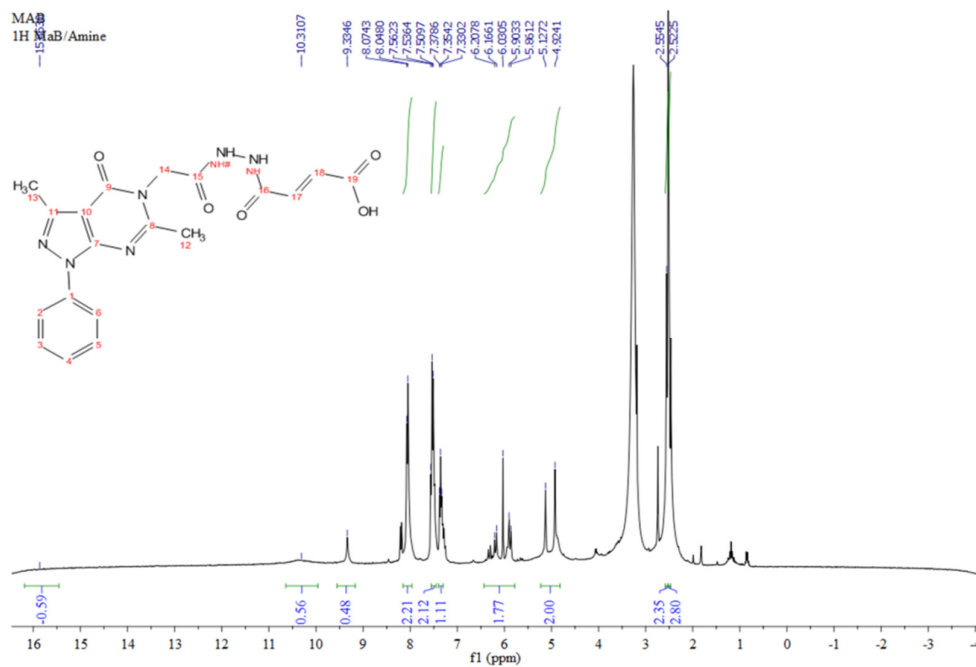

$^{13}\text{C}$ -NMR (126 MHz, d-DMSO)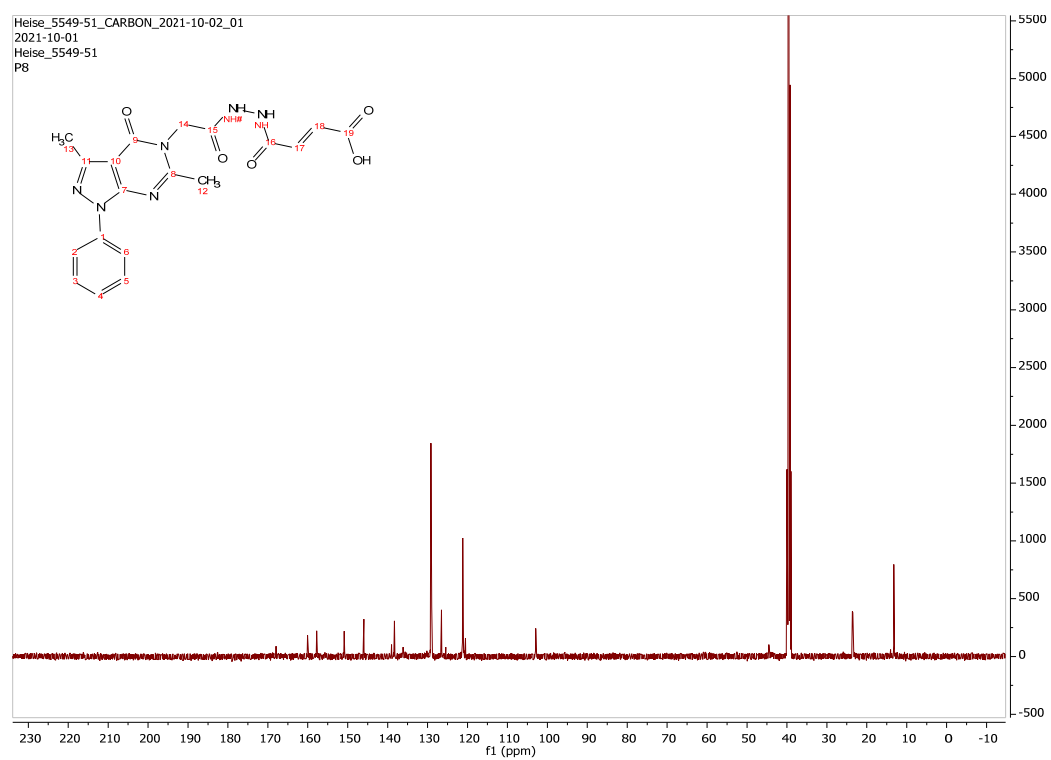

**Compound (13)**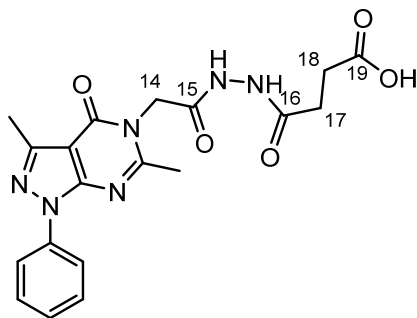

## NMR Spectra of 13

<sup>1</sup>H-NMR (500 MHz, d-DMSO)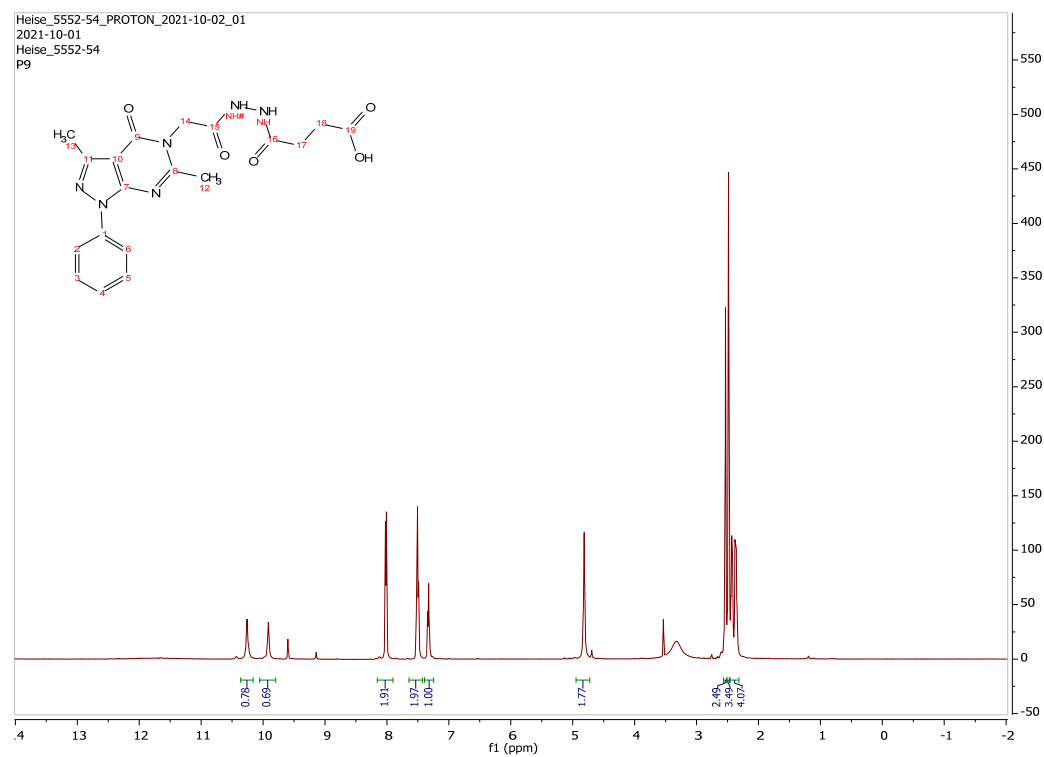

$^{13}\text{C}$ -NMR (126 MHz, d-DMSO)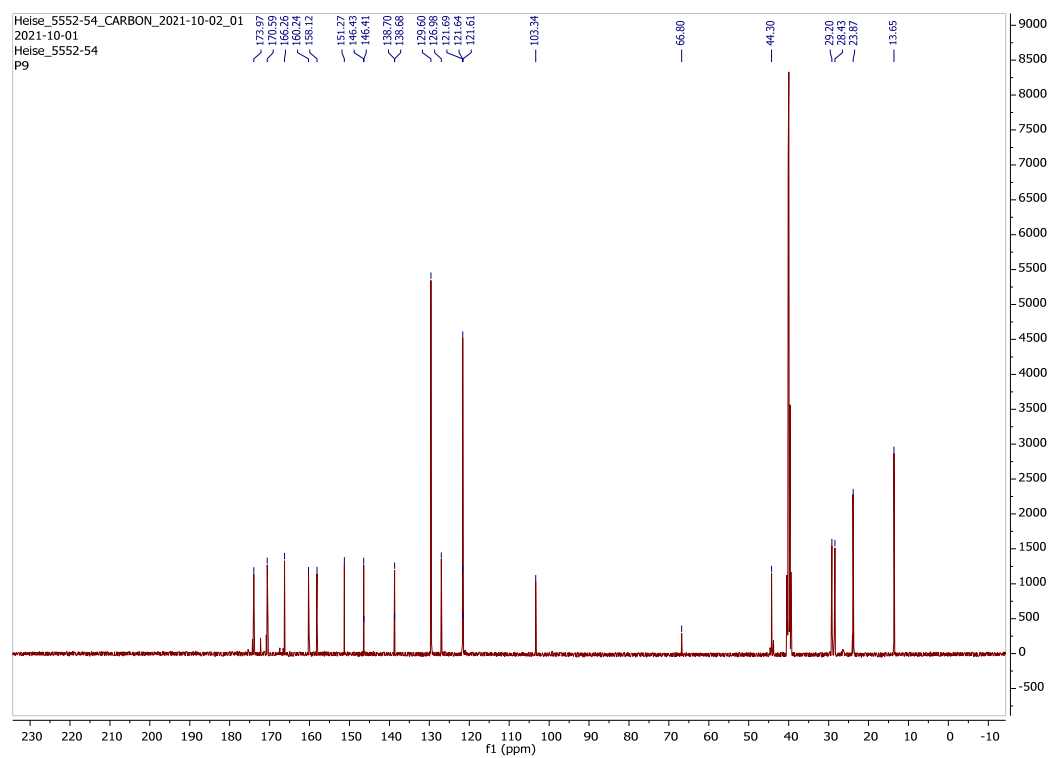

Supplement: s1 [file s1]
